# Supplementary material for: Screening and characterization of inhibitory vNAR targeting nanodisc-assembled influenza M2 proteins
Source: PubMed Central journal article supplement — iScience. 2022 Dec 5;26(1):105736. doi: 10.1016/j.isci.2022.105736 (PMC9771723; doi:10.1016/j.isci.2022.105736), 2022-12-05
Supplement: mmc1.pdf [file mmc1.pdf]

## **Supplemental information**

### **Screening and characterization of inhibitory**

### **vNAR targeting nanodisc-assembled**

### **influenza M2 proteins**

**Chuandi Yu, Wen Ding, Lei Zhu, Yuhang Zhou, Yingkui Dong, Ling Li, Juanjuan Liu, Yizhuo Wang, Zehua Li, Lina Zhu, FaJun Chen, Maosen Ruan, Dongming Qian, Yujuan Wang, Bo Wu, Huangtao Xu, Ming Li, Yunchen Bi, Hao Wang, Weiqian Wang, Peng Chao, Lei Xing, Bing Shen, Han Dai, Lisha Zha, Hongxin Zhao, and Junfeng Wang**

## Supplemental information

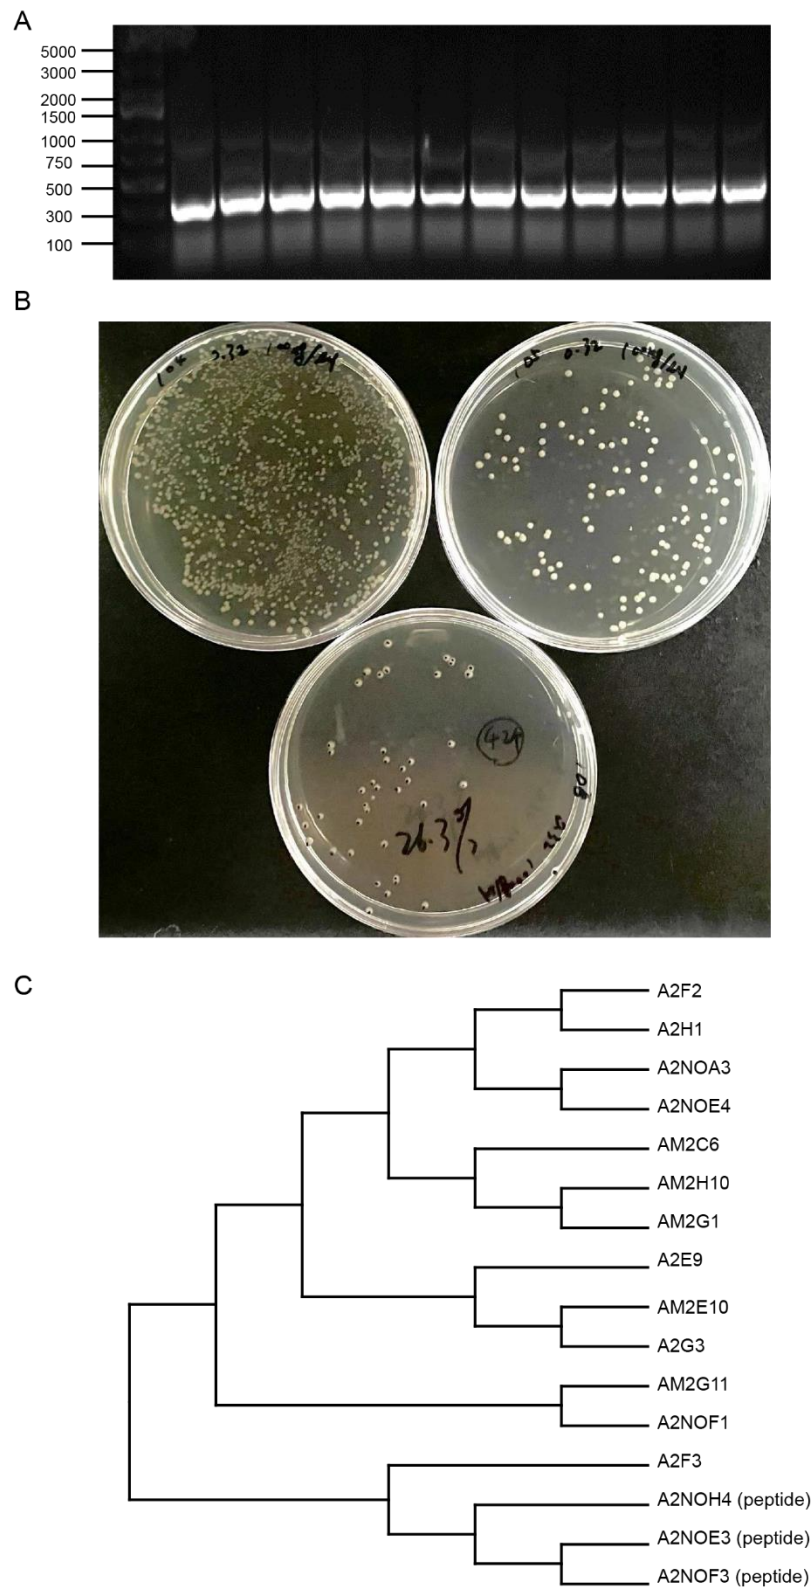

**Figure S1. Generation of vNAR fragments against M2. Related to Figure 3.**

(A) Agarose gel electrophoresis of VHH amplification products. (B) Plates for calculating the

library size. (C) Phylogenetic tree of selected vNARs.

**Table S1. Information of purified vNARs. Related to Figure 3.**

| SAMPLE | Protein<br>production (mg) | PI   |
|--------|----------------------------|------|
| A2NOE4 | 0.747                      | 9.14 |
| A2NOA3 | 1.343                      | 8.95 |
| AM2H10 | 0.833                      | 8.95 |
| A2H1   | 2.048                      | 8.91 |
| AM2G1  | 0.693                      | 8.72 |
| AM2G11 | 0.279                      | 8.73 |
| AM2C6  | 0.167                      | 9.28 |
| AM2E10 | 0.0837                     | 8.36 |
| A2E9   | 2.235                      | 7.62 |
| A2NOF1 | 0.831                      | 8.36 |
